# Supplementary material for: Patients’ Preferences for Primary Colorectal Cancer Screening: A Survey of the National Colorectal Cancer Screening Program in Korea
Source: PubMed Central journal article supplement — Gut Liver. 2017 Jul 28;11(6):821–7. doi: 10.5009/gnl17025 (PMC5669598; doi:10.5009/gnl17025), 2017-07-28
Supplement: gnl-11-821_suppl.pdf [file gnl-11-821_suppl.pdf]

**Supplementary Material 1.** Questionnaire for Patient Preference for Primary Colorectal Cancer Screening

The 'National Cancer Screening Program (NCSP)' for colorectal cancer (CRC) provides a single annual fecal immunochemical test (FIT) for adults aged  $\geq 50$  years, and secondary confirmatory colonoscopy for those with positive FIT results. This survey was developed to evaluate the preference of FIT or colonoscopy as the primary CRC screening tools for participants of NCSP.

**FIT** is a simple screening method to detect occult bleeding from CRC. It is widely used as a screening test for CRC in the world because it has the advantages in terms of discomfort, pain, and complications. However, the accuracy of FIT is poor, and colonoscopy should be performed additionally when FIT result is positive. Even though FIT is simple, its effect of preventing CRC is well documented. By contrast, **colonoscopy** has a high diagnostic accuracy and can remove adenomas and early cancers. However, troublesome bowel preparation is necessary for the colonoscopy, and some medications such as aspirin should be stopped before the colonoscopy. In addition, colonoscopy is more expensive than FIT, and associated with pain, discomfort, or procedure related complications (bleeding, perforation, cardiovascular complications, etc.). Therefore, colonoscopy may not be appropriate as a mass screening tool.

This survey will be used only as a research data related to the NCSP and the contents of the response are thoroughly protected. Your participation for this survey is free and there will be no disadvantage for non-participation. However, the results of this survey can be invaluable for the development of right policy in the NCSP, and as a result, it will be helpful to you.

Please cooperate with this survey.

**Part 1. Questions about the basic information of the respondent**

1. What is your gender?      (1) Male      (2) Female
2. What is your age in years? \_\_\_\_
3. What is your highest level of education?
 

|                                          |                                      |
|------------------------------------------|--------------------------------------|
| (1) Less than elementary school graduate | (2) Less than middle school graduate |
| (3) Less than high school graduate       | (4) Less than university graduate    |
| (5) More than university graduate        |                                      |
4. Which of following best describes your marital status?
 

|                             |             |              |             |
|-----------------------------|-------------|--------------|-------------|
| (1) Have never been married | (2) Married | (3) Divorced | (4) Widowed |
|-----------------------------|-------------|--------------|-------------|
5. Do you have a religion?      (1) No      (2) Yes
6. Which of following best describes your work status?
 

|                   |              |               |                  |
|-------------------|--------------|---------------|------------------|
| (1) Self-employed | (2) Employed | (3) Homemaker | (4) Not employed |
|-------------------|--------------|---------------|------------------|

7. What is your approximate monthly household income (won, ₩)?
- (1) No income                      (2) Less than 1,000,000                      (3) 1,000,000~2,000,000
- (4) 2,000,000~3,000,000                      (5) 3,000,000~5,000,000                      (6) More than 5,000,000
8. Are you a drinker?                      (1) No                      (2) Yes
9. Which of the following best describes your smoking?
- (1) Non-smoker                      (2) Current smoker                      (3) Past smoker
10. Do you have any other private insurance that you have joined in addition to “National Health Insurance”?
- (1) No                      (2) Yes
11. Which of the following have been diagnosed before? (Multiple selection possible)
- (1) Hypertension                      (2) Diabetes mellitus                      (3) Chronic kidney disease
- (4) Cardiovascular disease (myocardial infarction, angina)
- (5) Cerebrovascular disease (such as stroke)
- (6) Colorectal cancer and other cancers
12. Have you ever had a colorectal surgery before?                      (1) No                      (2) Yes
13. Has anyone in your family (grandparents, parents, brothers / sisters) suffered from colorectal cancer?
- (1) No                      (2) Yes
14. Do you know of any patients with colorectal cancer?                      (1) No                      (2) Yes
15. How do you think the your risk for colorectal cancer?                      (1) Low                      (2) Average                      (3) High
16. Do you know any colorectal cancer related symptoms when you have colorectal cancer?
- (1) No                      (2) Yes

**Part 2. Questions about National Cancer Screening Program**

The following questions ask for your opinion about the National Cancer Screening Program of colorectal cancer. Please answer all the questions. If you are unsure about how to answer any question, just give the best answer you can. Do not spend too much time answering, as your first thoughts are likely to be the most accurate. If you do not wish to answer any of these questions, please leave it blank and complete the details of the question and reason(s) why it was not answered.

1. How often do you undergo the National Cancer Screening Program of colorectal cancer?
- (1) Annually                      (2) Frequently                      (3) Often                      (4) Infrequently

2. Have you received a fecal immunochemical test (FIT) in the past? (1) No (2) Yes

(Please answer only those who selected 'Yes' in question 2 below.)

2-1. If you underwent a FIT before, did you experience any inconvenience for the FIT?

(1) No (2) Yes

2-2. If the FIT was inconvenience, what is the main reason?

(1) Stool sampling (2) Stool storage and transportation (3) Other ( )

3. Have you received a colonoscopy in the past? (1) No (2) Yes

(Please answer only those who selected 'Yes' in question 3 below.)

3-1. If you underwent a colonoscopy before, did you experience any inconvenience for the colonoscopy?

(1) No (2) Yes

3-2. If the colonoscopy was inconvenience, what was the main reason?

(1) Complicated preparation process (2) Complicated colonoscopy process itself

(3) High medical cost (4) Long procedure time (5) Other ( )

4. If you can choose the primary colorectal cancer screening test in your National Cancer Screening Program, which test would you choose?

(1) FIT (2) Colonoscopy (3) I do not choose both

4-1. What was the main reason you chose FIT? (Please answer only if you selected item 1 in question 4.)

(1) FIT is convenient and simple (2) FIT is safe  
 (3) FIT is inexpensive (4) Colonoscopy takes a long time  
 (5) Colonoscopy is too complicated process (6) Other ( )

4-2. What was the main reason you chose colonoscopy? (Please answer only if you selected item 2 in question 4.)

(1) Colonoscopy is accurate (2) Colonoscopy can provide therapeutic options  
 (3) FIT is inconvenient (4) Colonoscopy is convenient  
 (5) Other ( )

**Thank you for your precious time and answer!**

**This questionnaire will be used as an important resource for developing National Cancer Screening Program for colorectal cancer.**

## 국가 대장암 검진 사업에서 1차 선별 검사에 대한 선호도 조사

안녕하십니까?

현재, 국가 대장암 검진은 만 50세 이상의 남녀를 대상으로 매년 분변잠혈검사를 실시하여 양성일 때에만 2차 검사로 대장내시경 검사를 제공하고 있습니다. 이번 연구는 현행대로 1차 검사로 분변잠혈검사를 시행하는 경우와 비교하여 1차 검사로 대장내시경 검사를 시행하는 경우를 가정한 선호도 조사입니다.

이번 설문 조사는 국가암검진 사업과 관련된 기초 연구자료로만 사용되며 응답내용은 비밀이 철저히 보호됩니다. 설문 조사에 참여 여부는 자유이며 설문 조사에 참여하지 않더라도 불이익은 없습니다. 그러나 본 설문 조사의 결과는 국가 대장암 검진사업 발전에 귀중한 자료가 될 수 있으므로 결과적으로 검진대상자 분에게도 도움이 될 수 있을 것입니다.

**본 설문조사에 협조하여 주실 것을 부탁드립니다.**

소화기내과 임상전문간호사 최선희/ 소화기내과 교수 차재명 드림

### 국가 대장암 검진에 대한 분변잠혈검사와 대장내시경 검사의 장단점

**분변잠혈 검사:** 대장암에서 스며나오는 출혈을 대변으로 찾아내는 검사로, 검사 방법이 간단하고, 검사에 따른 불편감, 통증, 합병증이 없다는 장점이 있어 전세계적으로 널리 대장암 1차 선별검사로 이용되고 있다. 하지만, 검사 정확도가 떨어지고, 검사결과가 양성일 때 대장내시경 검사를 추가로 시행해야 하는 단점이 있다. 검사가 단순해 보여도 대장암 예방효과에 대해서는 충분히 입증되어 있다.

**대장내시경 검사:** 내시경을 항문에 직접 삽입하여 검사하기 때문에 진단 정확도가 높고, 샘종이나 조기암과 같은 병변을 제거할 수 있다는 장점이 있다. 하지만, 검사 전 대장세척을 해야 하기 때문에 다량의 장정결 약물을 복용해야 하며, 일부 복용 중이던 약물(예, 아스피린)을 중단해야 할 수도 있다. 분변잠혈 검사에 비해 비용이 비싸고, 검사 자체에 의한 통증, 불편감, 합병증(예, 출혈, 천공, 심혈관 합병증 등)이 발생할 수도 있습니다. 따라서, 전국민을 대상으로 하는 1차 선별검사로는 적당하지 않을 수도 있다.

**수검자 기본 정보에 대한 질문**

1. 귀하의 성별은 무엇입니까?                   (1) 남자                   (2) 여자
  
2. 귀하의 현재 나이는 몇 살입니까? 만 (    )세
  
3. 귀하의 학력은 다음 중 어디에 해당되니까?  
(1) 초등학교 졸업 이하           (2) 중학교 졸업                   (3) 고등학교 졸업  
(4) 대학교 졸업                   (5) 대학원 졸업 이상
  
4. 귀하의 결혼 상태는 다음 중 어디에 해당되니까?  
(1) 미혼                   (2) 기혼                   (3) 이혼                   (4) 배우자 사망
  
5. 귀하는 종교가 있습니까?           (1) 없다                   (2) 있다
  
6. 귀하의 직업은 무엇입니까?  
(1) 자영업                   (2) 직장인                   (3) 전업 주부                   (4) 무직
  
7. 귀하의 가족(본인+세대주)의 월 소득은 어느 정도입니까?  
(1) 소득이 없다                   (2) 월 100만원 미만  
(3) 월 100만원 이상 - 200만원 미만                   (4) 월 200만원 이상 - 300만원 미만  
(5) 월 300만원 이상 - 500만원 미만                   (6) 월 500만원 이상
  
8. 음주(소주 반병 이상/1주)를 하십니까?           (1) 예                   (2) 아니오
  
9. 흡연을 하십니까?                   (1) 예                   (2) 아니오  
                                                 (3) 과거 흡연을 했지만 지금은 중단하였다.
  
10. 귀하는 국민건강보험 외에 가입한 다른 사보험이 있습니까?  
(1) 없다                   (2) 있다

11. 다음 중에 이전에 진단 받았던 질환이 있습니까? (복수선택가능)

- (1) 고혈압      (2) 당뇨      (3) 만성콩팥병      (4) 심혈관질환 (심근경색, 협심증)  
(5) 뇌혈관 질환 (뇌졸중 등)      (6) 대장암 및 기타 암      (7) 염증성 장질환

12. 이전에 대장수술을 받았던 적이 있습니까?

- (1) 없음      (2) 있음

13. 가족 (조부모님, 부모님, 형제/자매) 중에 대장암을 앓았던 사람이 있었습니까?

- (1) 없다      (2) 있다

14. 귀하가 알고 있는 사람들 중에 대장암 환자가 있습니까?

- (1) 없다      (2) 있다

15. 귀하는 대장암에 걸릴 가능성이 얼마나 된다고 생각하십니까?

- (1) 낮다      (2) 평균 정도이다      (3) 높다

16. 대장암이 있을 때 나타날 수 있는 증상에 대해 알고 계십니까?

- (1) 모른다      (2) 알고 있다

### 국가 대장암 조기 검진 사업에 대한 설문

1. 평소에 국가 건강검진을 잘 받으십니까?

- (1) 항상 받는다      (2) 대부분 받는다      (3) 가끔 받는다      (4) 거의 안 받는다

2. 과거에 분변잠혈검사를 받아보셨습니까?      (1) 예      (2) 아니오

(아래는 2번 문항에서 '예'를 선택하신 분들만 답해주십시오)

2-1. 이전에 분변잠혈검사를 받아 보았다면 당시 불편했었던 경험이 있었습니까?

- (1) 없었다      (2) 있었다

2-2. 분변잠혈검사가 불편했던 경험이 있었다면 가장 큰 이유는 무엇입니까?

- (1) 채변 과정에서 불편감      (2) 병원까지 보관, 운반의 불편감  
(3) 기타 (\_\_\_\_\_)

3. 과거에 대장내시경을 받아보셨습니까?      (1) 예      (2) 아니오

(아래는 3번 문항에서 '예'를 선택하신 분들만 답해주십시오)

3-1. 이전에 대장내시경을 받아 보았다면 당시 불편했었던 경험이 있었습니까?

- (1) 없었다      (2) 있었다

3-2. 대장내시경 검사가 불편했었던 경험이 있었다면 가장 큰 이유는 무엇이었습니까?

- (1) 장정결 과정      (2) 내시경 시행 시 불편감      (3) 검사 금액  
(4) 검사 소요 시간에 대한 불만      (5) 기타 (\_\_\_\_\_)

4. 국가 대장암 검진 사업에서 1차 선별검사를 선택할 수 있다면, 어떤 검사를 선택하시겠습니까?

(단, 대장내시경 검사는 수면내시경 검사 비용은 지원하지 않습니다.)

- (1) 분변잠혈검사                      (2) 대장내시경 검사                      (3) 둘 다 안 한다

(4번 문항에서 **1번**을 선택하신 분만 답변해주시오.)

4-1. 분변잠혈검사를 선택하신 가장 큰 이유는 무엇입니까?

- (1) 검사가 간단하고 불편하지 않아서                      (2) 합병증 위험성이 없어서  
(3) 추가금액이 없어서                      (4) 대장내시경 검사를 받을 시간이 없어서  
(5) 대장내시경 검사가 더 불편하고 번거로워서  
(6) 기타 (\_\_\_\_\_)

(4번 문항에서 **2번**을 선택하신 분만 답변해주시오.)

4-2. 대장내시경 검사를 선택하신 가장 큰 이유는 무엇입니까?

- (1) 진단 정확도가 높아서                      (2) 검사와 치료가 동시에 가능해서  
(3) 분변잠혈검사가 더 불편하고 번거로워서  
(4) 대장내시경 검사도 불편하지 않아서  
(5) 기타 (\_\_\_\_\_)

긴 설문에 응해 주셔서 대단히 감사합니다.

이 설문은 국가 대장암 검진 사업을 발전시키는데 중요한 자료로 이용될 예정입니다.
